# Supplementary material for: Raman study of 2D anatase TiO2 nanosheets
Source: Royal Society of Chemistry journal article supplement (doi:10.1039/c6cp05496j), 2016-01-01
Supplement: c6cp05496j1.pdf [file c6cp05496j1.pdf]

## Electronic Supplementary Information

### Raman Study of 2D Anatase TiO<sub>2</sub> Nanosheets

Yang Zhang,<sup>†</sup> Wei Wu,<sup>†</sup> Ke Zhang, Caihong Liu, Aifang Yu, Mingzeng Peng and Junyi Zhai\*

Beijing Institute of Nanoenergy and Nanosystems, Chinese Academy of Sciences; National  
Center for Nanoscience and Technology (NCNST), Beijing, P. R. China, 100083

<sup>†</sup> These authors contributed equally.

#### Corresponding Authors

\**Email:* jyzhai@binn.cas.cn

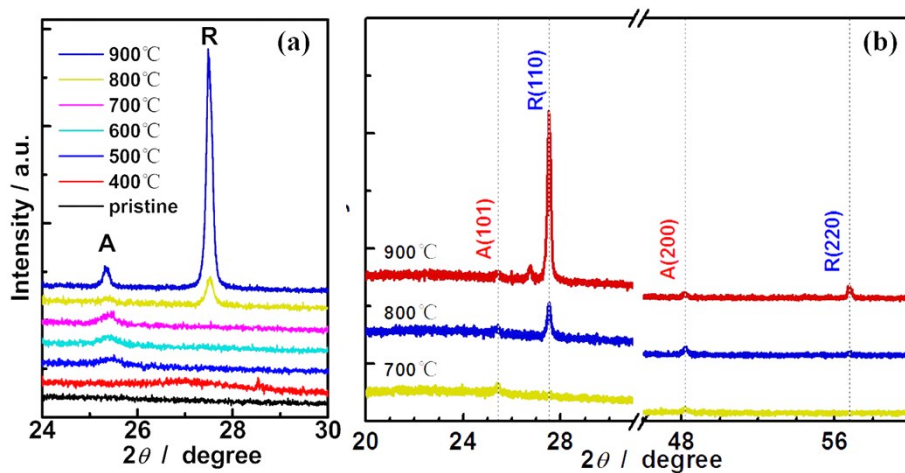

**Fig. S1** (a) XRD pattern of as-prepared few-layer protonic titanate and TiO<sub>2</sub> NSs which annealed in the temperature range of 400- 900 °C; (b) in the temperature range of 700-900 °C.

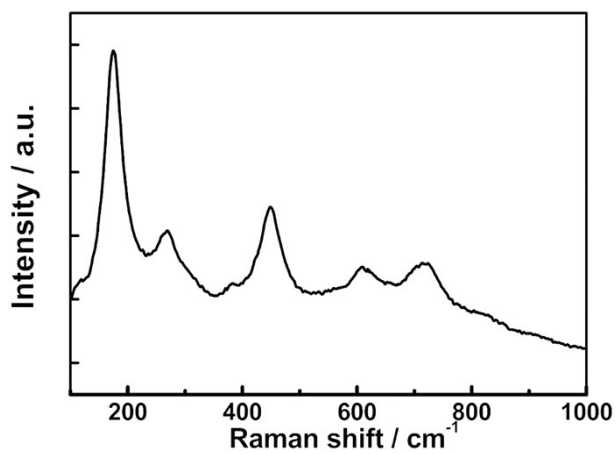

**Fig. S2** Raman spectrum of the unexfoliated protonic titanate NSs.

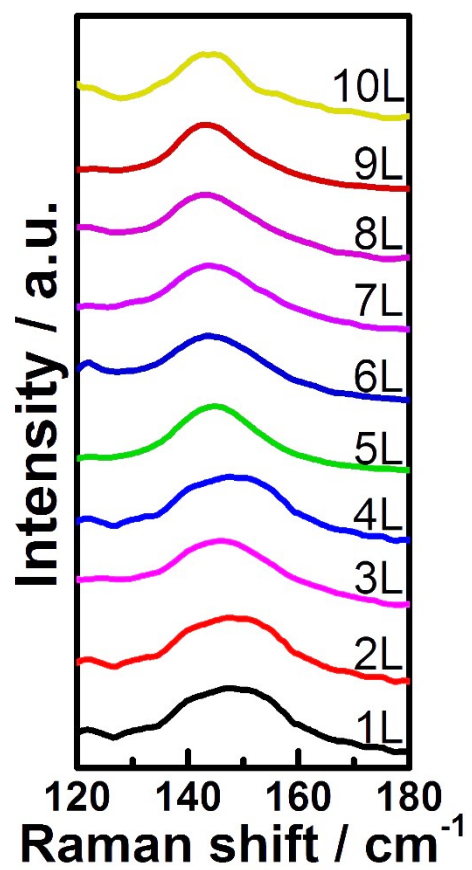

**Fig. S3** Raman spectra of TiO<sub>2</sub> NSs obtained from protonic titanate NSs with different thickness.
